# Supplementary material for: Microchromosomes Exhibit Distinct Features of Vertebrate Chromosome Structure and Function with Underappreciated Ramifications for Genome Evolution
Source: PubMed Central journal article supplement (PMC7947875; doi:10.1093/molbev/msaa253), 2020-09-28
Supplement: msaa253_supplementary_data.pdf [file msaa253_supplementary_data.pdf]

**Supplementary Table 1.** Hi-C datasets used in this study.

| Species                           | Common Name                    | Tissue                | Microchromosomes | Source                                                              | NCBI Accession                           |
|-----------------------------------|--------------------------------|-----------------------|------------------|---------------------------------------------------------------------|------------------------------------------|
| <i>Homo sapiens</i>               | Human                          | Retinal Epithelium    | No               | (Rao et al. 2014)                                                   | GEO: GSE63525                            |
| <i>Mus musculus x Mus spretus</i> | Mouse (Patski cell line)       | Kidney                | No               | (Darrow et al. 2016)                                                | GEO: GSE71831                            |
| <i>Macaca mulatta</i>             | Rhesus Macaque                 | Fibroblast            | No               | (Darrow et al. 2016)                                                | GEO: GSE71831                            |
| <i>Gallus gallus</i>              | Chicken                        | Mature Erythrocytes   | Yes              | (Fishman et al. 2018)                                               | BioSample: SAMN06555414,<br>SAMN06555414 |
|                                   |                                | Immature Erythrocytes | Yes              | (Fishman et al. 2018)                                               | BioSample: SAMN10291560,<br>SAMN10291559 |
|                                   |                                | Embryonic Fibroblasts | Yes              | (Fishman et al. 2018)                                               | BioSample: SAMN06555417,<br>SAMN06555416 |
| <i>Tympanuchus cupido</i>         | Greater Prairie Chicken        | Blood                 | Yes              | (Johnson et al.; Dudchenko et al. 2017; Dudchenko et al. 2018)      | BioSample: SAMN10973758                  |
| <i>Chelonia mydas</i>             | Green Sea Turtle               | Blood                 | Yes              | (Wang et al. 2013; Dudchenko et al. 2017; Dudchenko et al. 2018)    | BioSample: SAMN10973717                  |
| <i>Salvator merianae</i>          | Argentine Black and White Tegu | Blood                 | Yes              | (Dudchenko et al. 2017; Dudchenko et al. 2018; Roscito et al. 2018) | BioSample: SAMN10973771                  |
| <i>Crotalus viridis</i>           | Prairie Rattlesnake            | Venom gland           | Yes              | (Schield et al. 2019)                                               | BioSample: SAMN07738522                  |
| <i>Python bivittatus</i>          | Burmese Python                 | Blood                 | Yes              | (Castoe et al. 2013; Dudchenko et al. 2017; Dudchenko et al. 2018)  | BioSample: SAMN10973752                  |

Supplementary Table 2. Hi-C mapping and contact statistics output from Juicer Hi-C analysis pipeline.

|                                                                           | Human<br>(Retinal<br>Epithelium)    | Mouse<br>(Kidney)                   | Macaque<br>(Fibroblast)             | Chicken<br>(Mature<br>Erythrocytes) | Chicken<br>(Immature<br>Erythrocytes) | Chicken<br>(Embryonic<br>Fibroblasts) | Prairie<br>Chicken<br>(Blood)      | Sea Turtle<br>(Blood)              | Tegu<br>(Blood)                    | Rattlesnake<br>(Venom Gland)       | Python<br>(Blood)                  |
|---------------------------------------------------------------------------|-------------------------------------|-------------------------------------|-------------------------------------|-------------------------------------|---------------------------------------|---------------------------------------|------------------------------------|------------------------------------|------------------------------------|------------------------------------|------------------------------------|
| <b>Sequenced Read Pairs</b>                                               | 626,007,610                         | 580,083,428                         | 701,157,628                         | 261,175,632                         | 358,570,027                           | 276,677,613                           | 118,671,947                        | 135,271,653                        | 140,870,003                        | 195,378,673                        | 274,127,665                        |
| <b>Normal Paired<br/>(% Sequenced Reads)</b>                              | 305,144,884<br>(48.74%)             | 379,398,498<br>(65.40%)             | 579,963,191<br>(82.72%)             | 173,992,150<br>(66.62%)             | 174,107,133<br>(48.56%)               | 217,640,966<br>(78.66%)               | 100,090,013<br>(84.34%)            | 49,344,486<br>(36.48%)             | 73,786,879<br>(52.38%)             | 124,506,379<br>(63.73%)            | 129,656,423<br>(47.30%)            |
| <b>Chimeric Paired<br/>(% Sequenced Reads)</b>                            | 242,920,080<br>(38.80%)             | 0 (0.00%)                           | 81,842,940<br>(11.67%)              | 77,562,745<br>(29.70%)              | 146,084,058<br>(40.74%)               | 44,525,771 (16.09%)                   | 10,283,192<br>(8.67%)              | 63,913,102<br>(47.25%)             | 56,100,941<br>(39.82%)             | 44,190,474<br>(22.62%)             | 123,903,833<br>(45.20%)            |
| <b>Chimeric Ambiguous<br/>(% Sequenced Reads)</b>                         | 71,331,847<br>(11.39%)              | 0 (0.00%)                           | 18,541,357<br>(2.64%)               | 3,632,523 (1.39%)                   | 8,650,141 (2.41%)                     | 2,650,906 (0.96%)                     | 1,372,378<br>(1.16%)               | 18,123,962<br>(13.40%)             | 7,560,451<br>(5.37%)               | 18,225,522<br>(9.33%)              | 16,051,407<br>(5.86%)              |
| <b>Unmapped<br/>(% Sequenced Reads)</b>                                   | 6,610,799<br>(1.06%)                | 200,684,930<br>(34.60%)             | 20,810,140<br>(2.97%)               | 5,988,214 (2.29%)                   | 29,728,695 (8.29%)                    | 11,859,970 (4.29%)                    | 6,926,364<br>(5.84%)               | 3,890,103<br>(2.88%)               | 3,421,732<br>(2.43%)               | 8,456,298<br>(4.33%)               | 4,516,002<br>(1.65%)               |
| <b>Alignable<br/>(% Sequenced Reads)</b>                                  | 548,064,964<br>(87.55%)             | 379,398,498<br>(65.40%)             | 661,806,131<br>(94.39%)             | 251,554,895<br>(96.32%)             | 320,191,191<br>(89.30%)               | 262,166,737<br>(94.76%)               | 110,373,205<br>(93.01%)            | 113,257,588<br>(83.73%)            | 129,887,820<br>(92.20%)            | 168,696,853<br>(86.34%)            | 253,560,256<br>(92.50%)            |
| <b>Hi-C Contacts<br/>(% Sequenced Reads; %<br/>Unique Reads)</b>          | 395,343,162<br>(63.15% /<br>79.27%) | 194,327,529<br>(33.50% /<br>51.91%) | 407,127,169<br>(58.06% /<br>63.19%) | 202,114,957<br>(77.39% / 89.56%)    | 240,961,183 (67.20%<br>/ 80.68%)      | 135,149,878 (48.85%<br>/ 66.30%)      | 98,041,793<br>(82.62% /<br>90.40%) | 74,709,784<br>(55.23% /<br>74.71%) | 98,990,997<br>(70.27% /<br>84.18%) | 74,918,770<br>(38.35% /<br>66.61%) | 192,482,126<br>(70.22%;<br>86.76%) |
| <b>Inter-chromosomal<br/>(% Sequenced Reads; %<br/>Unique Reads)</b>      | 66,570,270<br>(10.63% /<br>13.35%)  | 36,578,807<br>(6.31% / 9.77%)       | 86,740,307<br>(12.37% /<br>13.46%)  | 72,419,139<br>(27.73% / 32.09%)     | 67,550,997 (18.84%<br>/ 22.62%)       | 12,407,240 (4.48% /<br>6.09%)         | 34,532,138<br>(29.10% /<br>31.84%) | 28,883,745<br>(21.35% /<br>28.88%) | 32,069,488<br>(22.77% /<br>27.27%) | 5,809,147<br>(2.97% / 5.16%)       | 59,111,119<br>(21.56%;<br>26.64%)  |
| <b>Intra-chromosomal<br/>(% Sequenced Reads; %<br/>Unique Reads)</b>      | 328,772,892<br>(52.52% /<br>65.92%) | 157,748,722<br>(27.19% /<br>42.14%) | 320,386,862<br>(45.69% /<br>49.73%) | 129,695,818<br>(49.66% / 57.47%)    | 173,410,186<br>(48.36% / 58.06%)      | 122,742,638<br>(44.36% / 60.21%)      | 63,509,655<br>(53.52% /<br>58.56%) | 45,826,039<br>(33.88% /<br>45.82%) | 66,921,509<br>(47.51% /<br>56.91%) | 69,109,623<br>(35.37% /<br>61.45%) | 133,371,007<br>(48.65%;<br>60.12%) |
| <b>Short Range (&lt;20Kb)<br/>(% Sequenced Reads; %<br/>Unique Reads)</b> | 113,928,677<br>(18.20% /<br>22.84%) | 40,521,898<br>(6.99% /<br>10.82%)   | 95,758,183<br>(13.66% /<br>14.86%)  | 29,548,271<br>(11.31% / 13.09%)     | 43,758,213 (12.20%<br>/ 14.65%)       | 63,552,780 (22.97%<br>/ 31.18%)       | 20,021,749<br>(16.87% /<br>18.46%) | 17,276,086<br>(12.77% /<br>17.28%) | 20,976,086<br>(14.89% /<br>17.84%) | 54,160,982<br>(27.72% /<br>48.15%) | 36,099,196<br>(13.17%;<br>16.27%)  |
| <b>Long Range (&gt;20Kb)<br/>(% Sequenced Reads; %<br/>Unique Reads)</b>  | 214,843,996<br>(34.32% /<br>43.08%) | 117,226,658<br>(20.21% /<br>31.31%) | 224,628,009<br>(32.04% /<br>34.87%) | 100,147,540<br>(38.34% / 44.38%)    | 129,651,970<br>(36.16% / 43.41%)      | 59,189,746 (21.39%<br>/ 29.04%)       | 43,487,829<br>(36.65% /<br>40.10%) | 28,549,941<br>(21.11% /<br>28.55%) | 45,945,389<br>(32.62% /<br>39.07%) | 14,948,351<br>(7.65% /<br>13.29%)  | 97,271,750<br>(35.48%;<br>43.84%)  |

**a) Chicken (CME)**

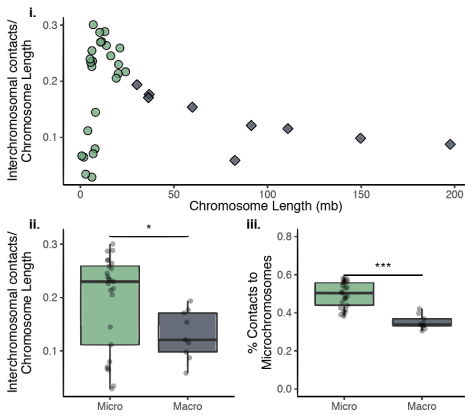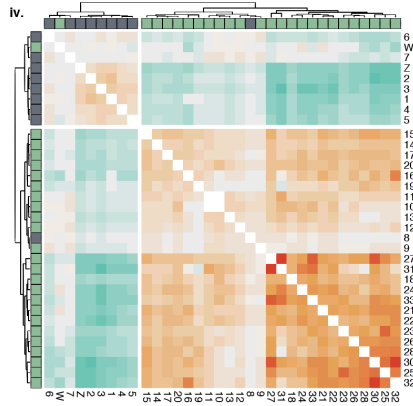

**b) Chicken (IE)**

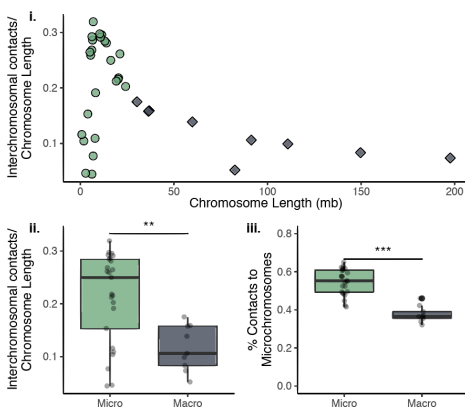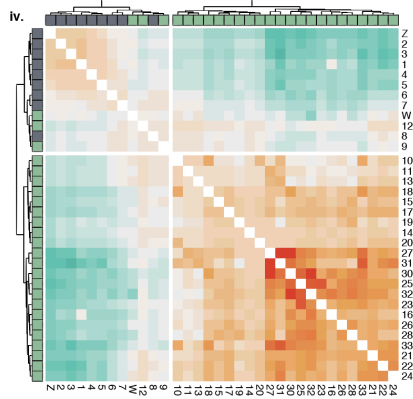

**c) Chicken (CEF)**

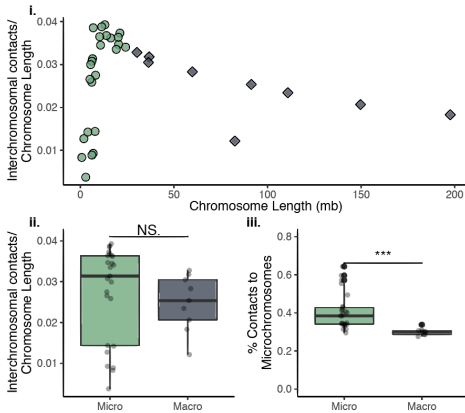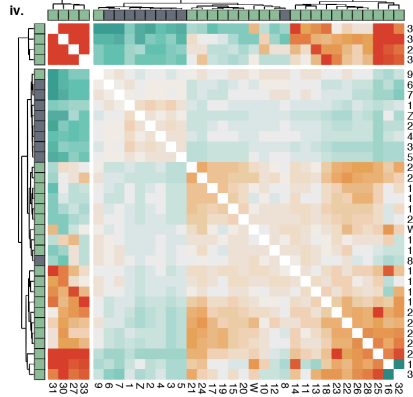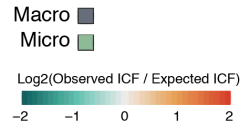

**Supplementary Figure 1. Microchromosomes interactions in three chicken tissues.** Patterns of interchromosomal interaction for chicken mature erythrocyte (CME), immature erythrocyte (IE), and embryonic fibroblast (CEF) cells. a.i-c.i) Sums of interchromosomal contact frequencies per chromosome normalized by chromosome length plotted over chromosome length. a.ii-c.ii) Comparisons of interchromosomal contact frequency normalized by chromosome length for macro and microchromosomes (\*: p-value < 0.05, \*\*\*: p-value < 0.001, Student's t-test). a.iii-c.iii) Comparison of the proportion of interchromosomal contacts that involve a microchromosome for macrochromosomes and microchromosomes (\*\*\*) denotes p < 0.001, Student's t-test). a.iv-c.iv) Heatmaps of the ratio of observed to expected interchromosomal contact frequency (ICF) between all chromosome pairs, with hierarchical clustering and chromosome type annotated above and to the left of each heatmap.

### Chicken (Mature Erythrocytes)

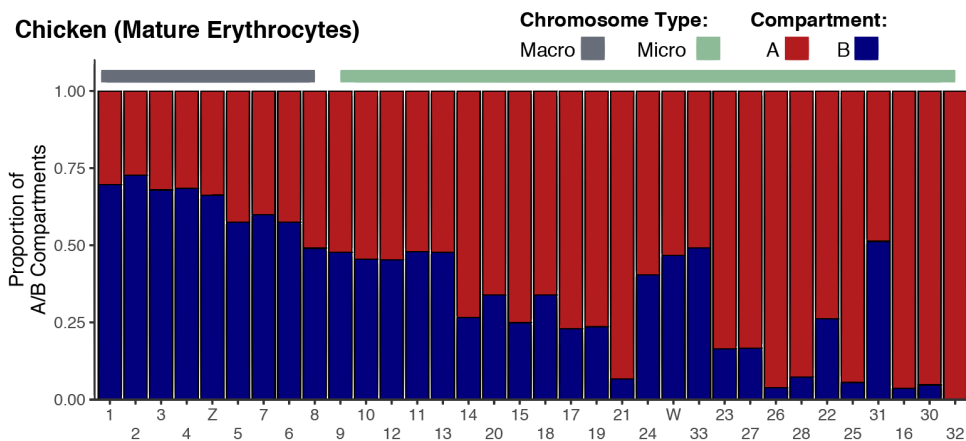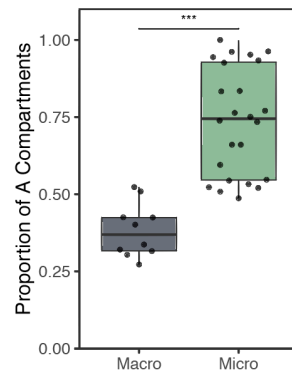

### Chicken (Immature Erythrocytes)

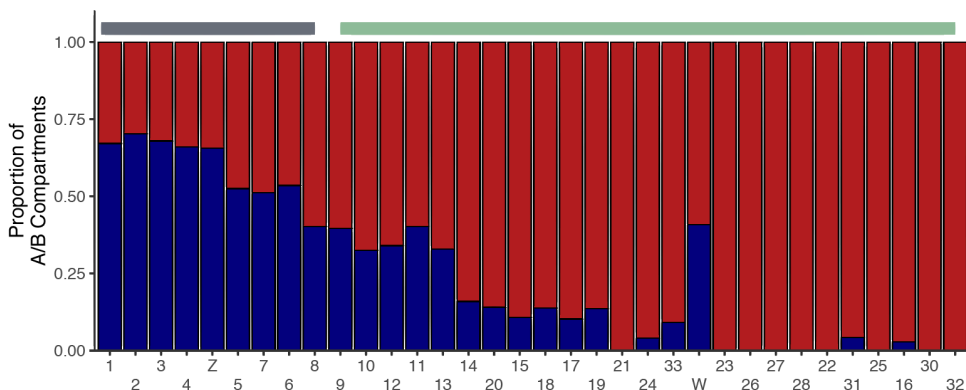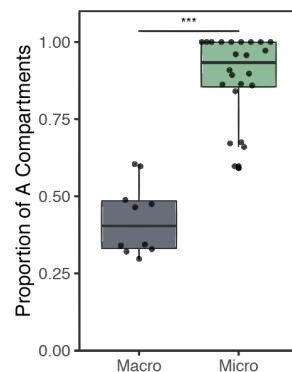

### Chicken (Embryonic Fibroblasts)

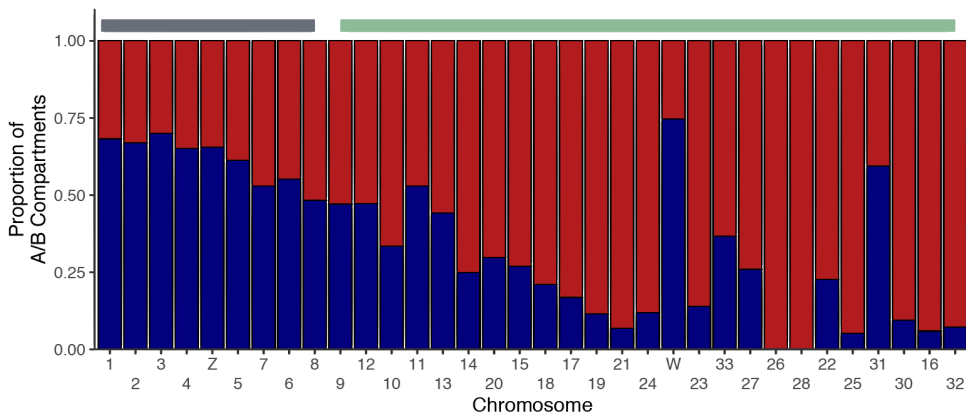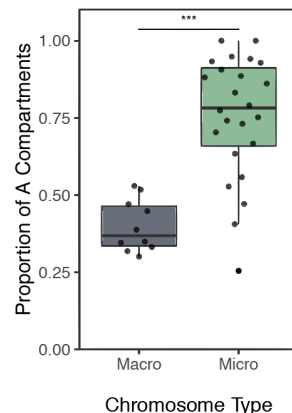

**Supplementary Figure 2. Microchromosomes are enriched for the A compartment in all three chicken tissues.** Bar plots indicate the proportion of 50 kb bins for each chromosome that were determined to be A (red) and B (blue) compartment. In all tissues, microchromosomes exhibit a higher proportion of A compartment bins than macrochromosomes (boxplots on right; \*\*\* denotes  $p < 0.001$ , Student's t-test).

a) Chicken (Mature Erythrocytes)

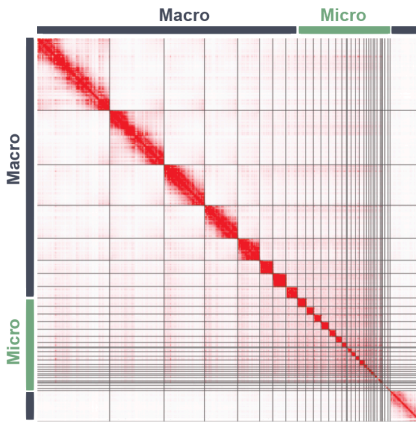

b) Chicken (Immature Erythrocytes)

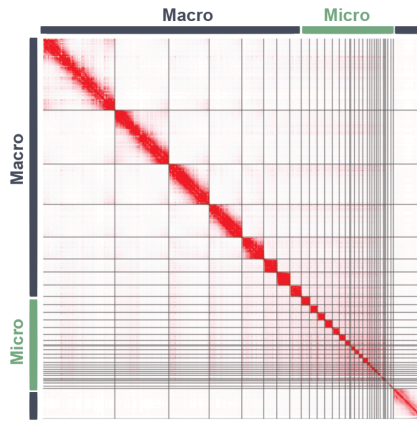

c) Chicken (Emryonic Fibroblasts)

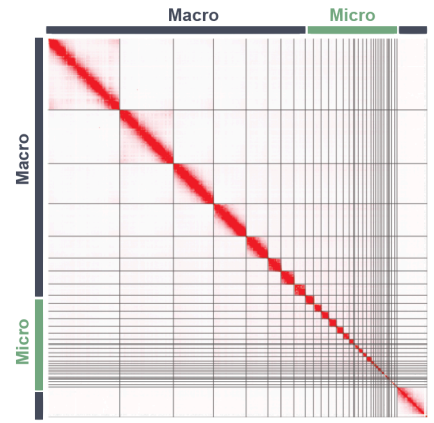

d) Prairie Chicken (Blood)

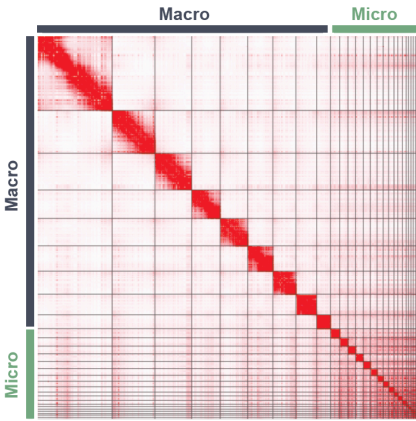

e) Sea Turtle (Blood)

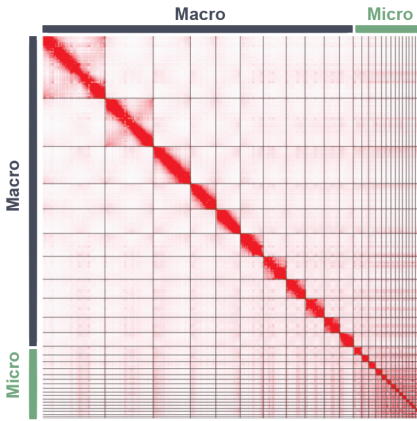

f) Rattlesnake (Venom Gland)

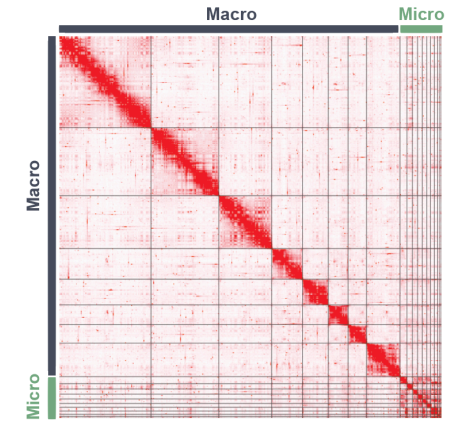

g) Python (Blood)

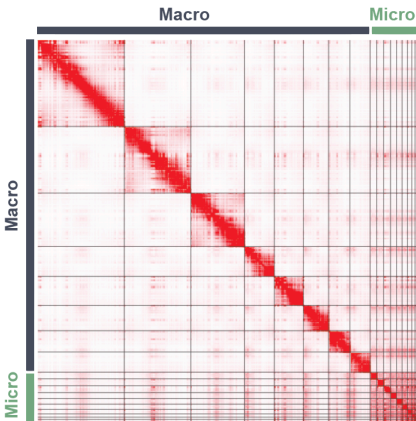

h) Tegu (Blood)

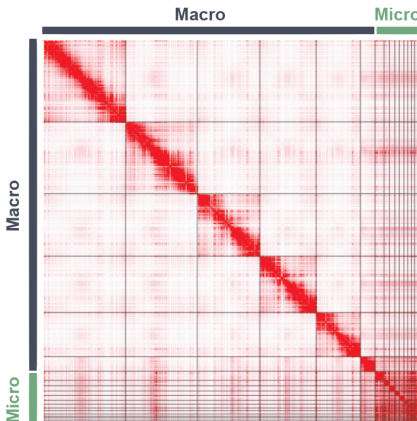

**Supplementary Figure 3.** Hi-C contact frequency heatmaps at 50kb resolution for all focal species possessing both macrochromosomes and microchromosomes. Darker red indicates higher contact frequency. Chromosome territories are evidenced by defined “blocks” of interaction frequency corresponding to chromosomes that indicate a high degree of self-interaction and lesser degree of interaction with other chromosomes.

## Prairie Chicken

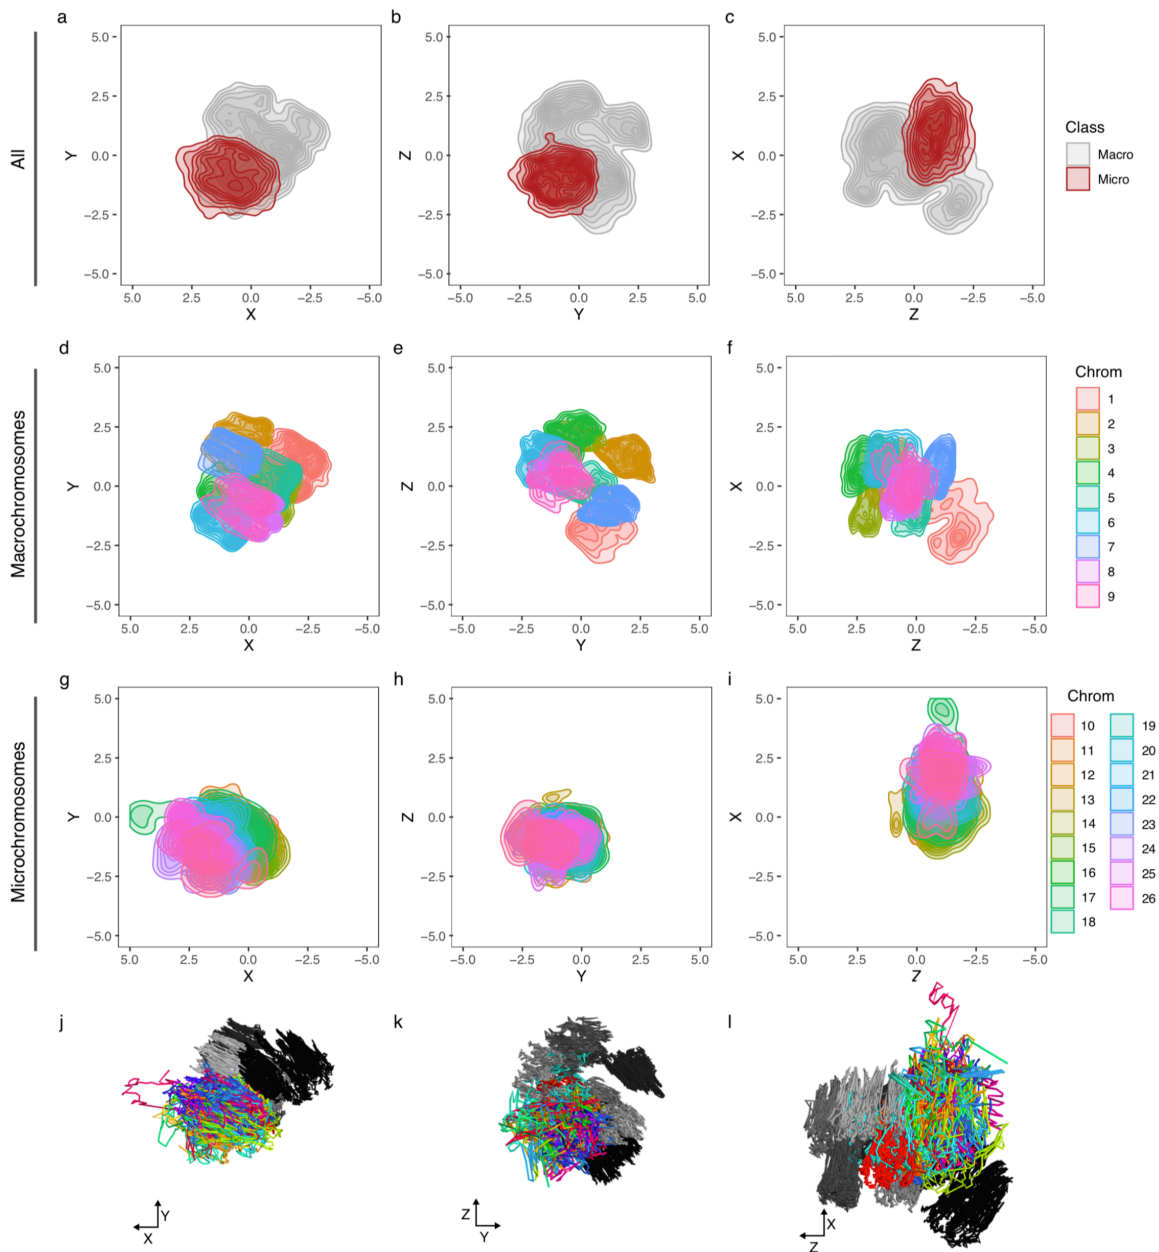

**Supplementary Figure 4.** 3D interpretation of Prairie Chicken Hi-C interaction data is shown at three distinct orientations (left, center, and right columns), with plots of 2D point density of 3D chromosome models. A-C) 2D point density of all microchromosomes (red) and macrochromosomes (grey). D-F) 2D point density of macrochromosomes only, with each macrochromosome shown as a different color. G-I) 2D point density of microchromosomes only, with each macrochromosome shown as a different color. J-L) 3D models of all chromosomes, with macrochromosomes shown in greyscale and microchromosomes in color.

## Sea Turtle

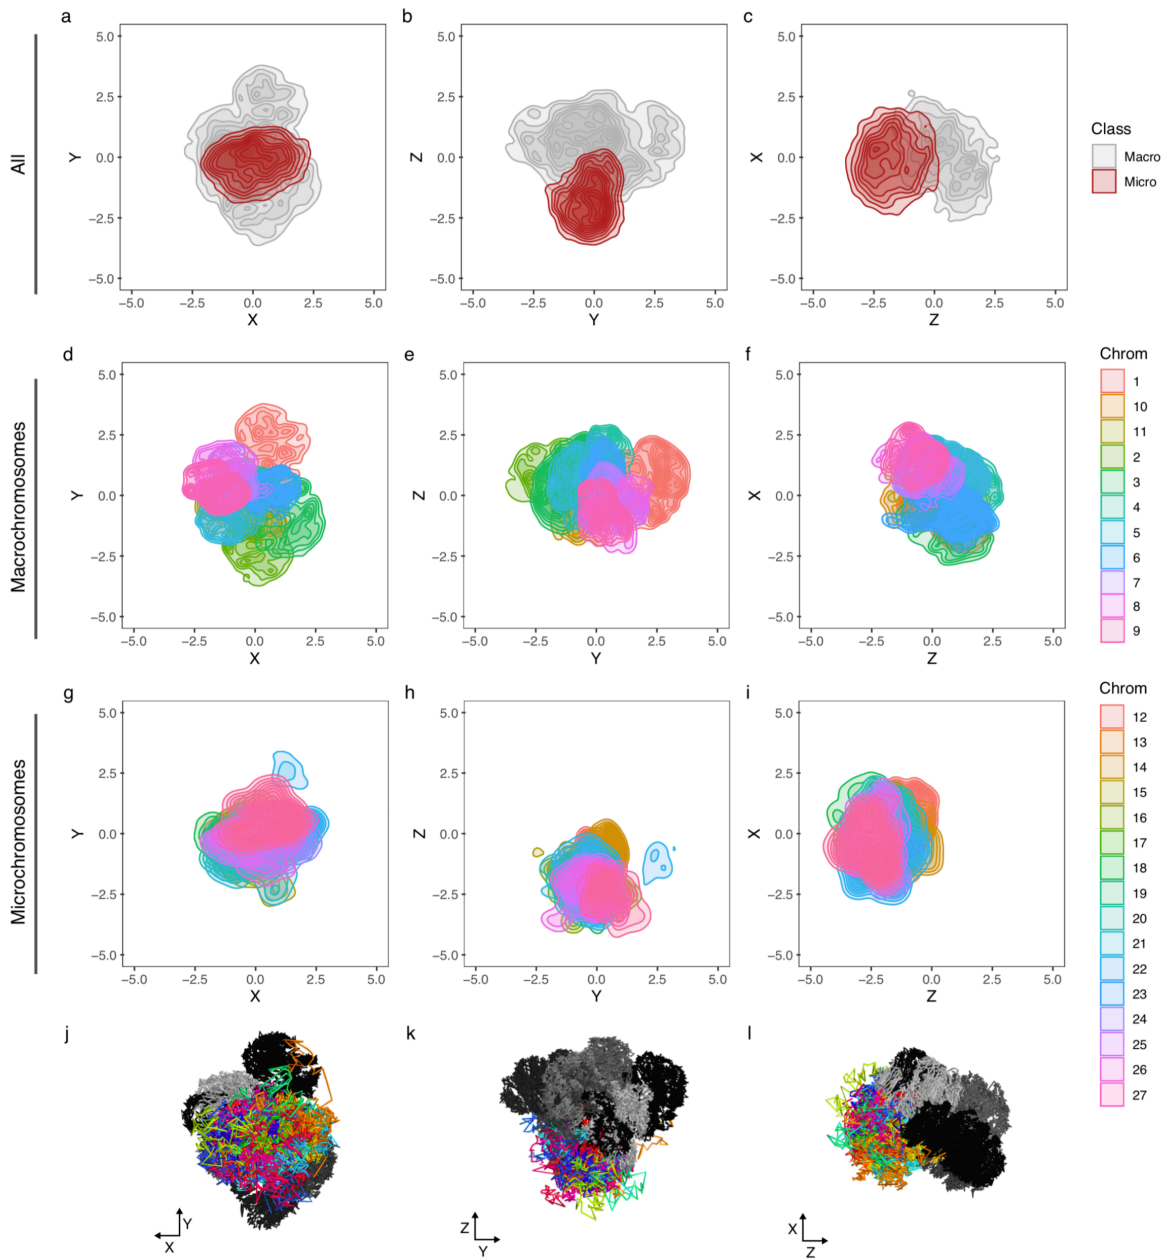

**Supplementary Figure 5.** 3D interpretation of Sea Turtle Hi-C interaction data is shown at three distinct orientations (left, center, and right columns), with plots of 2D point density of 3D chromosome models. A-C) 2D point density of all microchromosomes (red) and macrochromosomes (grey). D-F) 2D point density of macrochromosomes only, with each macrochromosome shown as a different color. G-I) 2D point density of microchromosomes only, with each macrochromosome shown as a different color. J-L) 3D models of all chromosomes, with macrochromosomes shown in greyscale and microchromosomes in color.

## Rattlesnake

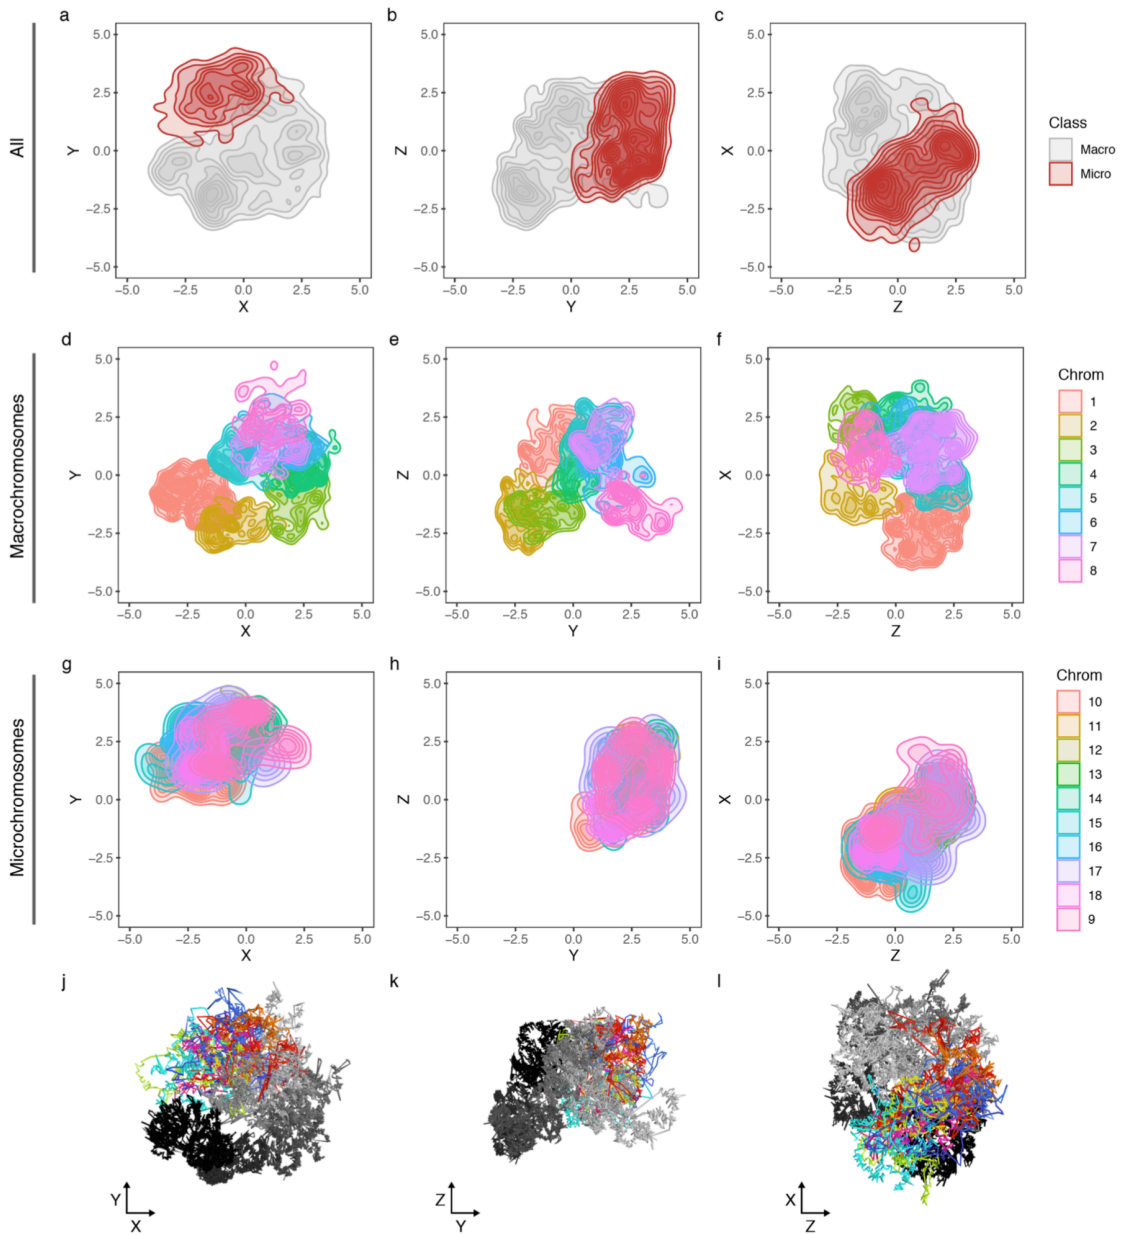

**Supplementary Figure 6.** 3D interpretation of Rattlesnake Hi-C interaction data is shown at three distinct orientations (left, center, and right columns), with plots of 2D point density of 3D chromosome models. A-C) 2D point density of all microchromosomes (red) and macrochromosomes (grey). D-F) 2D point density of macrochromosomes only, with each macrochromosome shown as a different color. G-I) 2D point density of microchromosomes only, with each macrochromosome shown as a different color. J-L) 3D models of all chromosomes, with macrochromosomes shown in greyscale and microchromosomes in color.



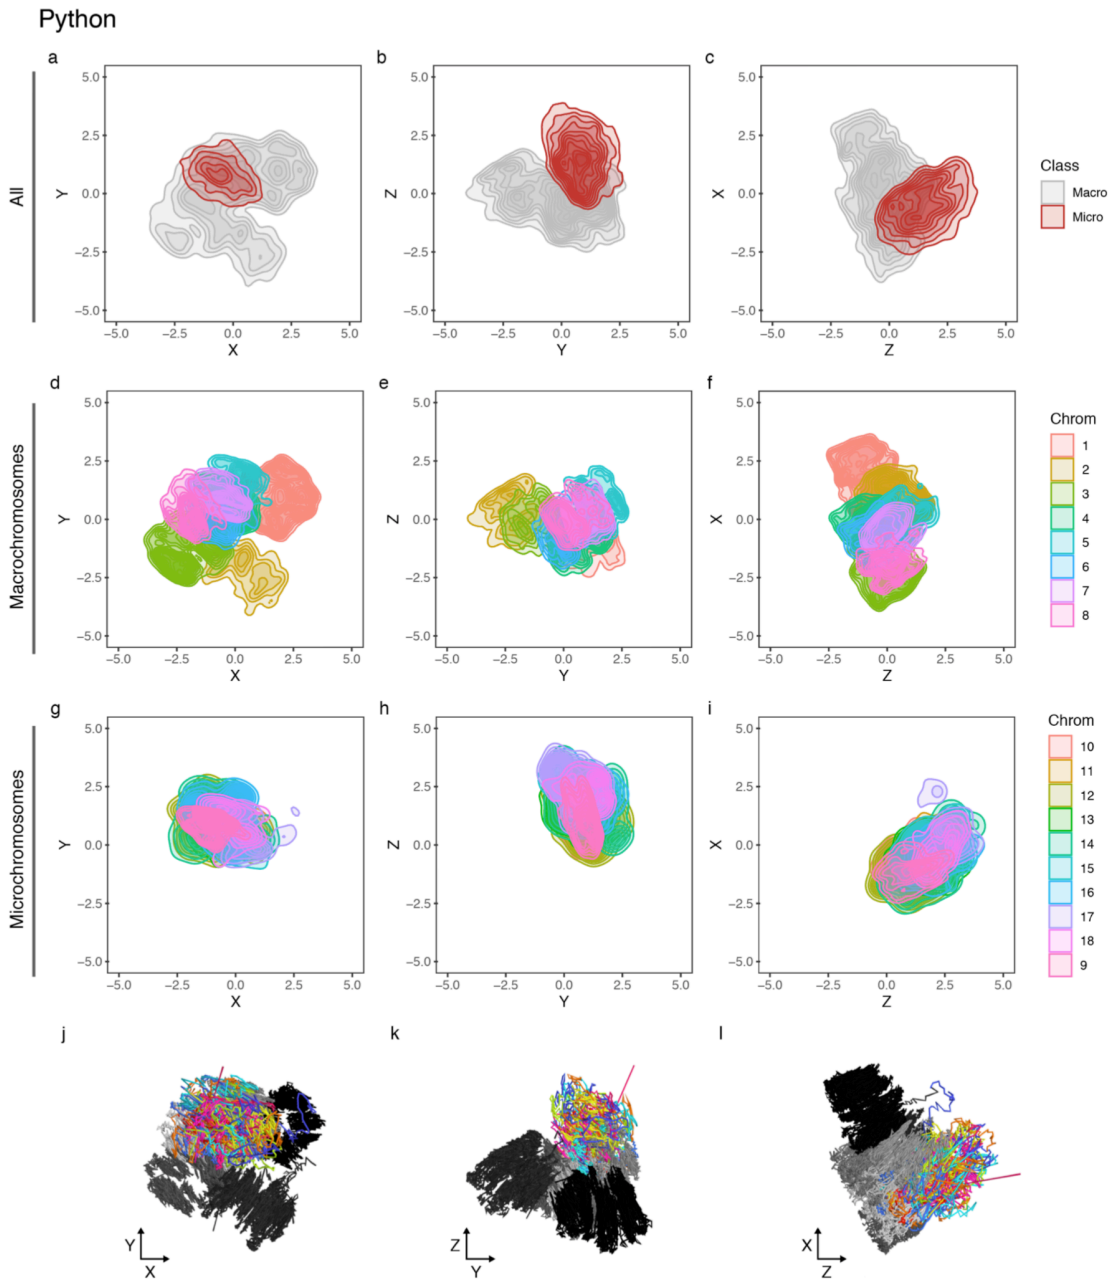

**Supplementary Figure 7.** 3D interpretation of Python Hi-C interaction data is shown at three distinct orientations (left, center, and right columns), with plots of 2D point density of 3D chromosome models. A-C) 2D point density of all microchromosomes (red) and macrochromosomes (grey). D-F) 2D point density of macrochromosomes only, with each macrochromosome shown as a different color. G-I) 2D point density of microchromosomes only, with each microchromosome shown as a different color. J-L) 3D models of all chromosomes, with macrochromosomes shown in greyscale and microchromosomes in color.

## Tegu

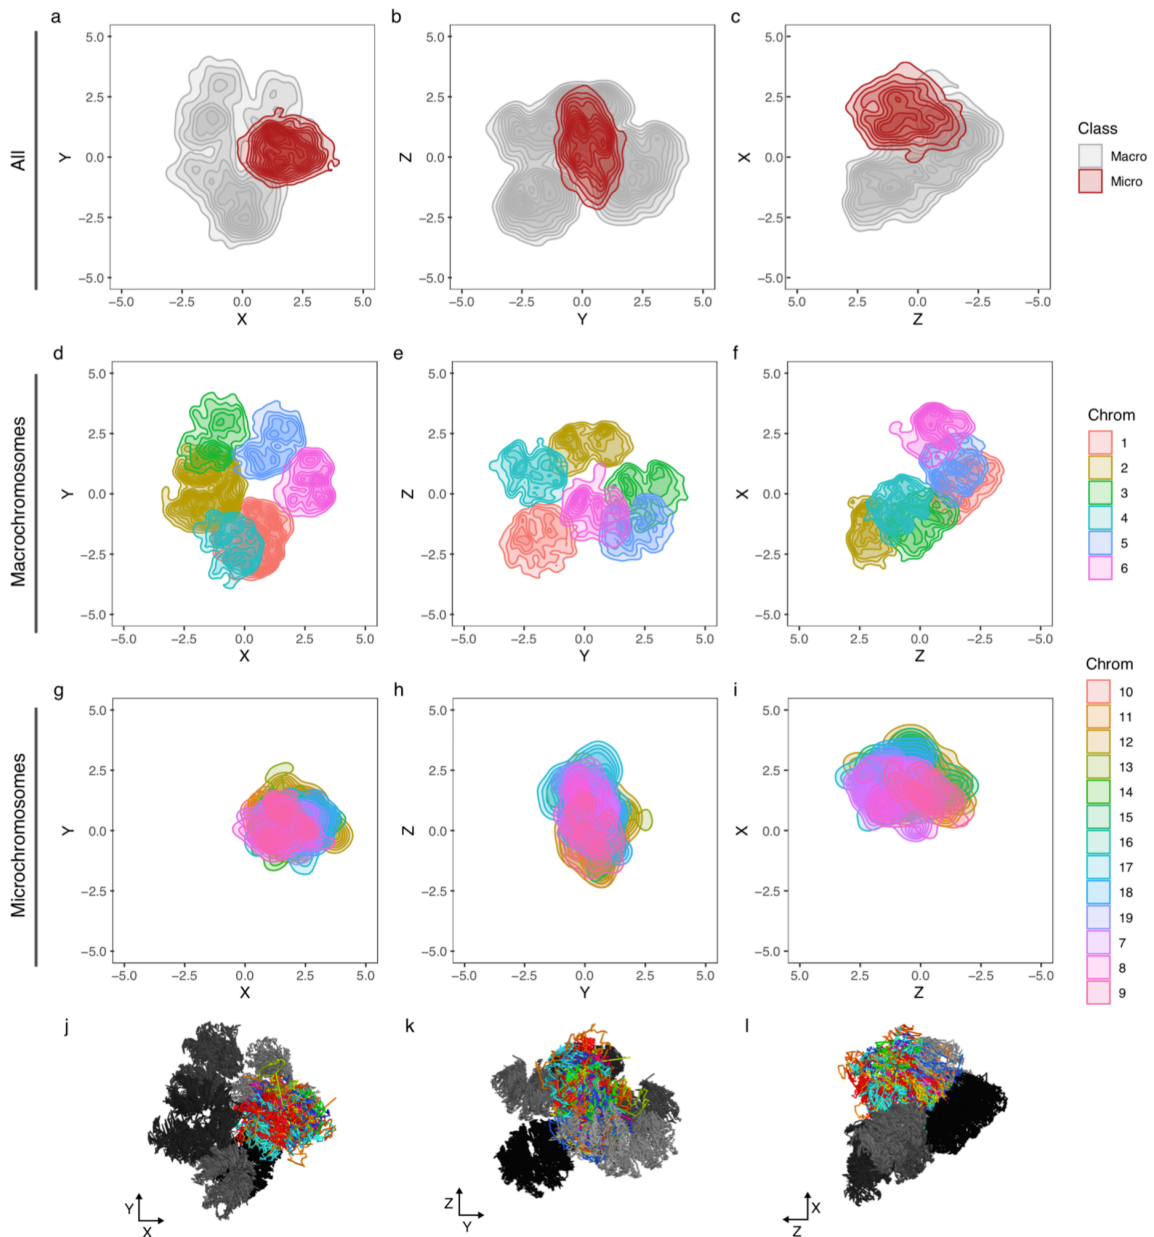

**Supplementary Figure 8.** 3D interpretation of Tegu Hi-C interaction data is shown at three distinct orientations (left, center, and right columns), with plots of 2D point density of 3D chromosome models. A-C) 2D point density of all microchromosomes (red) and macrochromosomes (grey). D-F) 2D point density of macrochromosomes only, with each macrochromosome shown as a different color. G-I) 2D point density of microchromosomes only, with each macrochromosome shown as a different color. J-L) 3D models of all chromosomes, with macrochromosomes shown in greyscale and microchromosomes in color.

## Works Cited:

- Castoe TA, de Koning APJ, Hall KT, Card DC, Schield DR, Fujita MK, Ruggiero RP, Degner JF, Daza JM, Gu W, et al. 2013. The Burmese python genome reveals the molecular basis for extreme adaptation in snakes. *Proc. Natl. Acad. Sci.* [Internet] 110:20645–20650. Available from: <http://www.ncbi.nlm.nih.gov/pubmed/24297902>
- Darrow EM, Huntley MH, Dudchenko O, Stamenova EK, Durand NC, Sun Z, Huang S-C, Sanborn AL, Machol I, Shamim M. 2016. Deletion of DXZ4 on the human inactive X chromosome alters higher-order genome architecture. *Proc. Natl. Acad. Sci.* 113:E4504–E4512.
- Dudchenko O, Batra SS, Omer AD, Nyquist SK, Hoeger M, Durand NC, Shamim MS, Machol I, Lander ES, Aiden AP. 2017. De novo assembly of the *Aedes aegypti* genome using Hi-C yields chromosome-length scaffolds. *Science* (80-. ). 356:92–95.
- Dudchenko O, Shamim MS, Batra S, Durand NC, Musial NT, Mostofa R, Pham M, St Hilaire BG, Yao W, Stamenova E. 2018. The Juicebox Assembly Tools module facilitates de novo assembly of mammalian genomes with chromosome-length scaffolds for under \$1000. *bioRxiv*:254797.
- Fishman V, Battulin N, Nuriddinov M, Maslova A, Zlotina A, Strunov A, Chervyakova D, Korablev A, Serov O, Krasikova A. 2018. 3D organization of chicken genome demonstrates evolutionary conservation of topologically associated domains and highlights unique architecture of erythrocytes' chromatin. *Nucleic Acids Res.* 47:648–665.
- Johnson J, Novak BJ, Athrey G, Shapiro B, Phelan R. Whole genome sequence analysis reveals evolutionary history of extinct Heath Hen. Unpublished.
- Rao SSP, Huntley MH, Durand NC, Stamenova EK, Bochkov ID, Robinson JT, Sanborn AL, Machol I, Omer AD, Lander ES. 2014. A 3D map of the human genome at kilobase resolution reveals principles of chromatin looping. *Cell* 159:1665–1680.
- Roscito JG, Sameith K, Pippel M, Francoijs K-J, Winkler S, Dahl A, Papoutsoglou G, Myers G, Hiller M. 2018. The genome of the tegu lizard *Salvator merianae*: combining Illumina, PacBio, and optical mapping data to generate a highly contiguous assembly. *Gigascience* 7:giy141.
- Schild DR, Card DC, Hales NR, Perry BW, Pasquesi GM, Blackmon H, Adams RH, Corbin AB, Smith CF, Ramesh B. 2019. The origins and evolution of chromosomes, dosage compensation, and mechanisms underlying venom regulation in snakes. *Genome Res.* 29:590–601.
- Wang Z, Pascual-Anaya J, Zadissa A, Li W, Niimura Y, Huang Z, Li C, White S, Xiong Z, Fang D. 2013. The draft genomes of soft-shell turtle and green sea turtle yield insights into the development and evolution of the turtle-specific body plan. *Nat. Genet.* 45:701–706.
